# Supplementary material
Source: Springer Nature journal article supplement (https://www.springermedizin.de/resource/supplementary/13256_2011_2043_MOESM4_ESM.pdf/9649770)
Supplement: MOESM4 [file 9649770]

Table 1. Summary of the reported cases of primary synovial sarcoma in the GI tract\*

| <i>Author, reference</i>            | <i>location</i>            | <i>Presenting symptoms</i>                          | <i>Age (years)</i> | <i>Gender</i> | <i>Size (cm)</i> | <i>Gross features</i> | <i>Histologic type</i>                            | <i>translocation</i> | <i>treatment</i> | <i>Follow-up (months)</i>      |
|-------------------------------------|----------------------------|-----------------------------------------------------|--------------------|---------------|------------------|-----------------------|---------------------------------------------------|----------------------|------------------|--------------------------------|
| Palmer et al, 1983[16]              | esophagus                  | dysphagia                                           | 75                 | F             | 2.5              | Polypoid              | Biphasic                                          | ---                  | S+ Rad           | DOD, 24                        |
| Amr SS et al, 1984[17]              | esophagus                  | dysphagia                                           | 25                 | M             | 5                | Polypoid              | Biphasic                                          | ---                  | S+ Rad           | AWOD,36                        |
| Bloch et al, 1987[18]               | esophagus                  | Dysphagia, dyspnea                                  | 15                 | M             | 7                | Polypoid              | Biphasic                                          | --                   | S+ Rad           | AWOD, 36                       |
| Pulpiero et al, 1988[19]            | esophagus                  |                                                     | 24                 | M             |                  |                       | Biphasic                                          | --                   | S                | NR                             |
| Caldwell et al, 1991[20]            | esophagus                  |                                                     | 29                 | F             |                  |                       | NR                                                | --                   | S+ Rad +Chemo    | AWOD, 195                      |
| Perch et al, 1991 [21]              | esophagus                  |                                                     | 15                 | M             |                  |                       | Biphasic                                          | --                   | S+ Rad           | AWOD, 6-5 yrs after surgery    |
| Antón-Pacheco et al, 1996[22]       | esophagus                  | Dysphagia, weight loss                              | 14                 | F             | 7                | Polypoid              | Biphasic                                          | --                   | S+ chemo+ Rad    | AWOD, 30                       |
| Habu S et al 1998 [23]              | esophagus                  | Sensation of something stuck in the throat          | 20                 | M             | 8                | Polypoid              | Biphasic                                          | --                   | S+ chemo+ Rad    | AWOD, 20                       |
| Bonavina et al, 1998[24]            | esophagus                  | achalasia                                           | 63                 | F             |                  | Polypoid              | NR                                                | --                   | --               | --                             |
| Billings et al, 2000[25]            | Gastro-esophageal junction | Incidental finding for pyloric stenosis             | 47                 | M             | 5.2              | Polypoid              | Biphasic                                          | t(X; 18)             | S                | AWOD, 21                       |
| Billings et al, 2000[25]            | stomach                    | Abdominal pain, nausea, vomiting and retal bleeding | 55                 | F             | 16               | Spherical, intramural | Biphasic and PDSS                                 | t(X; 18)             | S                | DOD, 6                         |
| Chan et al, 2004 [26]               | jejunum                    | Epigastric pain, vomiting and fever                 | 28                 | M             | 15               | Polypoid, intramural  | Monophasic                                        | t(X; 18), SSX2       | S                | DOD, 1                         |
| Butori et al, 2006 [27]             | esophagus                  | dysphagia                                           | 72                 | F             | 11               | Polypoid              | Biphasic                                          | t(X; 18)             | S+ Chemo         | 6                              |
| Akhunji et al, 2007 [28]            | stomach                    | Epigastric pain                                     | 42                 | M             | 11               |                       | Biphasic                                          | t(X; 18)             | S+ chemo         | DOD, 24                        |
| Parfitt et al, 2007 [L]             | Colon                      | Rectal bleeding                                     | 32                 | M             | 2                | Polypoid              | Mono-phasic                                       | t(X; 18)             | S                | 5                              |
| Schreiber-Fracklam et al, 2007 [30] | Distal duodenum            | Abdominal pain                                      | 39                 | F             | 5                | Polypoid              | Mono-phasic                                       | t(X; 18)-SSX2        | S+ Chemo         | Recurrence 8 mon after surgery |
| Makhlouf et al, 2008 [32]           | stomach                    |                                                     | 67                 | F             | 0.8              |                       | Monophasic                                        | t(X; 18)             | S                | AWOD, 12                       |
| Makhlouf et al, 2008 [32]           | stomach                    |                                                     | 49                 | M             | 2                |                       | Monophasic with a poorly differentiated component | t(X; 18)             | S                | DOD, omental metastasis, 29    |
| Makhlouf et al, 2008 [32]           | stomach                    |                                                     | 68                 | F             | 2                |                       | Monophasic                                        | t(X; 18)             | S                | AWOD, 22                       |
| Makhlouf et al, 2008 [32]           | stomach                    |                                                     | 29                 | M             | 2.8              |                       | Monophasic                                        | t(X; 18)             | S                | AWOD, 224                      |

|                           |                                   |                                                                     |    |   |    |                       |            |          |          |                                     |
|---------------------------|-----------------------------------|---------------------------------------------------------------------|----|---|----|-----------------------|------------|----------|----------|-------------------------------------|
| Makhlouf et al, 2008 [32] | Stomach, gastro-duodenal junction |                                                                     | 54 | F | 3  |                       | Monophasic | t(X; 18) | S        | Recent case                         |
| Makhlouf et al, 2008 [32] | stomach                           |                                                                     | 58 | F | 3  |                       | Monophasic | t(X; 18) | S        | AWOD, 21                            |
| Makhlouf et al, 2008 [32] | stomach                           |                                                                     | 37 | F | 4  |                       | Monophasic | t(X; 18) | S        | Local recurrence, reexcised. DOC 48 |
| Makhlouf et al, 2008 [32] | stomach                           |                                                                     | 50 | M | 6  |                       | Monophasic | t(X; 18) | S+ chemo | Alive with recurrence, 6            |
| Makhlouf et al, 2008 [32] | stomach                           |                                                                     | 42 | M | 8  | Polypoid              | Biphasic   | t(X; 18) | S+ chemo | DOD, 25                             |
| Makhlouf et al, 2008 [32] | stomach                           |                                                                     | 66 | F | 15 | Polypoid              | Monophasic | t(X; 18) | S        | Lost to follow up                   |
| Company et al, 2009 [31]  | Proximal duodenum                 | Weight loss<br>asthenia,<br>anorexia,<br>nausea,<br>epigastric pain | 69 | F | 8  | Spherical, intramural | Monophasic | t(X; 18) | S        | Died due to complications, 1        |
| Present case, 2010        | ileum                             | Abdominal pain,<br>distension and heaviness                         | 39 | F | 8  | intramural            | Monophasic | ----     | S        | AWOD, 6                             |

\*The second case reported by Billings[25] could represent a metastatic focus of a primary neck tumor showed the same histopathological features.  
Abbreviations: M, male; F, female; DOD, died of disease; AWOD, alive without evidence of disease; AWD, alive with residual disease; DOC, died of other cause; NR, not reported; S, surgery; Rad, radiotherapy; Chemo, chemotherapy.
